# Supplementary material for: Groundwater Quality Assessment in a Karst Coastal Region of the West Aurunci Mountains (Central Italy)
Source: Hindawi journal article supplement (doi:10.1155/2019/3261713), 2019-03-20
Supplement: f1 [file 3261713.f1.docx]

| ID | Data [dd/mm/yyyy] | EC [µS/cm] | Na [mg/l] | K [mg/l] | Ca [mg/l] | Mg [mg/l] | Cl [mg/l] | SO4 [mg/l] | NO**3** [mg/l] | HCO3 [mg/l] |
| --- | --- | --- | --- | --- | --- | --- | --- | --- | --- | --- |
| TUL_01 | 01/08/2017 | 607 | 27.3 | 12.4 | 62.9 | 11.3 | 44.7 | 30.6 | 16.3 | 244.0 |
| TUL_02 | 08/08/2017 | 661 | 19.6 | 3.1 | 86.3 | 12.9 | 42.8 | 27.8 | 17.6 | 475.8 |
| TUL_03 | 25/08/2017 | 661 | 29.9 | 1.8 | 88.6 | 15.7 | 56.8 | 27.2 | 14.8 | 353.8 |
| TUL_04 | 30/08/2017 | 644 | 20.5 | 1.0 | 83.3 | 12.5 | 43.3 | 32.3 | 17.4 | 317.2 |
| TUL_05 | 31/08/2017 | 664 | 16.7 | 2.1 | 72.9 | 9.8 | 44.2 | 30.1 | 18.6 | 268.4 |
| TUL_06 | 01/09/2017 | 662 | 18.1 | 0.4 | 75.4 | 10.2 | 45.4 | 30.4 | 18.0 | 280.6 |
| TUL_07 | 14/09/2017 | 663 | 20.5 | 1.0 | 88.1 | 12.9 | 48.1 | 31.5 | 18.6 | 329.4 |
| TUL_08 | 18/09/2017 | 683 | 23.2 | 1.0 | 95.0 | 14.1 | 55.0 | 29.6 | 16.3 | 366.0 |
| TUL_09 | 18/09/2017 | 684 | 22.6 | 1.0 | 95.5 | 13.9 | 55.8 | 29.9 | 16.5 | 366.0 |
| TUL_10 | 02/10/2017 | 740 | 23.9 | 1.0 | 92.9 | 13.4 | 80.9 | 30.2 | 15.0 | 353.8 |
| TUL_11 | 10/10/2017 | 764 | 30.3 | 2.4 | 120.6 | 17.8 | 91.2 | 29.6 | 14.3 | 451.4 |
| TUL_12 | 02/11/2017 | 835 | 33.3 | 1.9 | 111.2 | 15.3 | 123.2 | 29.8 | 13.4 | 414.8 |
| TUL_13 | 08/11/2017 | 843 | 32.4 | 1.5 | 112.5 | 16.4 | 122.2 | 30.2 | 13.3 | 427.0 |
| TUL_14 | 13/11/2017 | 835 | 32.4 | 1.4 | 113.1 | 16.0 | 122.6 | 29.9 | 13.1 | 427.0 |
| TUL_15 | 20/11/2017 | 846 | 36.7 | 1.0 | 116.4 | 16.3 | 136.7 | 29.8 | 12.9 | 439.2 |
| TUL_16 | 27/11/2017 | 858 | 35.6 | 0.3 | 114.4 | 14.6 | 137.3 | 30.8 | 13.3 | 427.0 |
| TER_01 | 09/07/2018 | 1102 | 55.0 | 1.4 | 133.3 | 32.9 | 196.0 | 69.2 | 28.5 | 573.4 |
| TER_02 | 11/07/2018 | 1146 | 58.0 | 2.0 | 140.1 | 34.1 | 218.3 | 69.6 | 27.6 | 597.8 |
| MAZ_01 | 11/01/2016 | 301 | 2.7 | 0.3 | 31.1 | 1.1 | 6.7 | 2.9 | 1.3 | 97.6 |
| MAZ_02 | 08/02/2016 | 301 | 4.1 | 0.3 | 51.7 | 5.9 | 11.8 | 3.9 | 1.7 | 183.0 |
| MAZ_03 | 14/03/2016 | 309 | 4.9 | 1.0 | 59.4 | 5.1 | 8.5 | 4.3 | 1.5 | 207.4 |
| MAZ_04 | 11/04/2016 | 308 | 4.8 | 0.7 | 58.4 | 9.8 | 7.2 | 3.9 | 1.5 | 231.8 |
| MAZ_05 | 20/04/2016 | 313 | 5.1 | 5.0 | 59.1 | 11.9 | 7.2 | 4.0 | 1.5 | 244.0 |
| MAZ_06 | 09/05/2016 | 310 | 4.6 | 1.0 | 58.7 | 4.4 | 7.4 | 3.6 | 1.7 | 195.2 |
| MAZ_07 | 06/06/2016 | 313 | 3.2 | 0.9 | 47.4 | 7.2 | 7.9 | 3.9 | 1.9 | 183.0 |
| MAZ_08 | 18/07/2016 | 309 | 4.2 | 0.3 | 49.5 | 7.7 | 8.1 | 3.7 | 1.9 | 195.2 |
| MAZ_09 | 25/07/2016 | 309 | 4.2 | 0.3 | 50.2 | 8.0 | 8.1 | 3.8 | 1.9 | 195.2 |
| MAZ_10 | 02/08/2016 | 308 | 4.4 | 0.4 | 50.9 | 9.1 | 8.1 | 3.7 | 1.9 | 195.2 |
| MAZ_11 | 12/09/2016 | 302 | 4.5 | 0.5 | 50.2 | 9.9 | 9.2 | 3.8 | 1.8 | 207.4 |
| MAZ_12 | 03/10/2016 | 303 | 4.6 | 0.8 | 50.5 | 9.0 | 8.5 | 3.7 | 1.8 | 195.2 |
| MAZ_13 | 18/10/2016 | 302 | 4.3 | 0.5 | 49.7 | 8.6 | 9.7 | 3.9 | 1.8 | 195.2 |
| MAZ_14 | 02/11/2016 | 296 | 4.5 | 0.4 | 50.6 | 9.7 | 8.3 | 3.7 | 1.9 | 207.4 |
| MAZ_15 | 20/12/2016 | 297 | 4.2 | 0.2 | 50.7 | 7.3 | 8.3 | 3.9 | 1.9 | 195.2 |
| MAZ_16 | 04/01/2017 | 299 | 4.6 | 0.6 | 50.8 | 10.5 | 7.9 | 3.0 | 1.8 | 207.4 |
| MAZ_17 | 08/02/2017 | 304 | 2.9 | 0.2 | 52.1 | 1.0 | 8.0 | 3.6 | 2.1 | 158.6 |
| MAZ_18 | 10/04/2017 | 280 | 4.7 | 0.4 | 50.9 | 9.5 | 7.5 | 3.5 | 1.7 | 207.4 |
| MAZ_19 | 02/05/2017 | 301 | 2.1 | 0.7 | 40.5 | 6.6 | 7.2 | 3.3 | 1.7 | 158.6 |
| MAZ_20 | 08/06/2017 | 300 | 2.5 | 0.1 | 43.9 | 3.1 | 7.3 | 3.3 | 1.7 | 146.4 |
| MAZ_21 | 24/07/2017 | 298 | 2.6 | 0.1 | 40.4 | 7.4 | 7.3 | 3.1 | 1.6 | 158.6 |
| MAZ_22 | 01/08/2017 | 307 | 3.5 | 0.3 | 42.5 | 8.6 | 7.3 | 3.2 | 1.6 | 170.8 |
| MAZ_23 | 11/09/2017 | 297 | 3.6 | 8.2 | 41.4 | 8.2 | 7.2 | 3.2 | 1.8 | 170.8 |
| MAZ_24 | 04/10/2017 | 307 | 2.3 | 1.3 | 34.8 | 6.5 | 7.2 | 3.2 | 1.6 | 134.2 |
| MAZ_25 | 23/10/2017 | 295 | 3.6 | 0.6 | 47.0 | 8.9 | 7.4 | 3.3 | 1.6 | 183.0 |
| MAZ_26 | 06/11/2017 | 297 | 3.5 | 0.4 | 40.1 | 7.6 | 6.6 | 3.0 | 1.4 | 158.6 |
| MAZ_27 | 11/12/2017 | 306 | 4.1 | 0.1 | 49.6 | 8.3 | 11.7 | 3.5 | 2.9 | 195.2 |
| MAZ_28 | 09/01/2018 | 298 | 5.1 | 0.9 | 57.3 | 8.6 | 8.7 | 3.7 | 1.8 | 219.6 |
| CAP_01 | 25/01/2016 | 288 | 2.2 | 0.1 | 33.9 | 1.5 | 5.3 | 2.9 | 1.1 | 109.8 |
| CAP_02 | 17/02/2016 | 325 | 3.2 | 0.1 | 57.4 | 1.2 | 7.1 | 2.8 | 0.8 | 183.0 |
| CAP_03 | 14/03/2016 | 310 | 3.9 | 1.0 | 59.3 | 7.1 | 6.5 | 3.8 | 1.4 | 219.6 |
| CAP_04 | 14/03/2016 | 302 | 3.7 | 0.5 | 56.9 | 7.0 | 6.1 | 3.5 | 1.0 | 207.4 |
| CAP_05 | 21/03/2016 | 294 | 3.8 | 0.6 | 53.3 | 7.9 | 6.3 | 3.4 | 1.3 | 207.4 |
| CAP_06 | 04/04/2016 | 285 | 4.1 | 1.0 | 52.5 | 9.6 | 5.7 | 3.0 | 1.3 | 207.4 |
| CAP_07 | 23/05/2016 | 282 | 3.9 | 1.1 | 52.9 | 4.9 | 6.0 | 3.1 | 1.3 | 183.0 |
| CAP_08 | 06/06/2016 | 276 | 2.6 | 0.1 | 40.6 | 7.2 | 6.5 | 3.3 | 1.2 | 158.6 |
| CAP_09 | 04/07/2016 | 277 | 3.8 | 0.6 | 45.3 | 9.9 | 6.6 | 3.3 | 1.5 | 183.0 |
| CAP_10 | 02/08/2016 | 279 | 3.5 | 0.4 | 44.3 | 9.2 | 6.5 | 3.1 | 1.3 | 183.0 |
| CAP_11 | 03/10/2016 | 278 | 3.7 | 0.4 | 44.9 | 10.0 | 6.8 | 3.2 | 1.5 | 183.0 |
| CAP_12 | 28/11/2016 | 317 | 4.0 | 8.5 | 57.5 | 8.5 | 7.6 | 3.6 | 1.8 | 219.6 |
| CAP_13 | 12/12/2016 | 285 | 3.7 | 0.3 | 50.6 | 8.3 | 6.7 | 3.3 | 1.4 | 195.2 |
| CAP_14 | 27/12/2016 | 271 | 2.9 | 0.3 | 43.9 | 6.8 | 5.6 | 2.9 | 1.3 | 170.8 |
| CAP_15 | 23/01/2017 | 300 | 3.7 | 0.8 | 50.3 | 7.4 | 6.7 | 3.1 | 1.4 | 195.2 |
| CAP_16 | 15/02/2017 | 303 | 2.9 | 0.4 | 49.8 | 1.0 | 7.1 | 3.2 | 1.3 | 158.6 |
| CAP_17 | 10/04/2017 | 258 | 3.7 | 0.5 | 46.5 | 9.6 | 6.3 | 2.8 | 1.4 | 195.2 |
| CAP_18 | 08/06/2017 | 267 | 2.1 | 0.1 | 36.9 | 3.3 | 5.7 | 2.7 | 1.2 | 134.2 |
| CAP_19 | 03/07/2017 | 272 | 2.0 | 0.1 | 36.0 | 7.7 | 5.6 | 2.6 | 1.2 | 146.4 |
| CAP_20 | 01/08/2017 | 285 | 3.0 | 0.4 | 38.5 | 8.8 | 6.0 | 2.7 | 1.3 | 158.6 |
| CAP_21 | 18/09/2017 | 278 | 3.5 | 0.4 | 38.9 | 8.9 | 5.7 | 2.5 | 1.2 | 158.6 |
| CAP_22 | 04/10/2017 | 277 | 2.3 | 0.1 | 33.6 | 7.5 | 5.8 | 2.7 | 1.2 | 134.2 |
| CAP_23 | 20/11/2017 | 302 | 2.8 | 0.1 | 47.0 | 8.7 | 8.1 | 3.3 | 1.8 | 183.0 |
| CAP_24 | 06/12/2017 | 304 | 3.4 | 0.7 | 50.0 | 7.9 | 8.4 | 3.3 | 2.1 | 195.2 |
| CAP_25 | 06/12/2017 | 312 | 3.7 | 1.0 | 51.0 | 8.0 | 9.0 | 3.5 | 2.2 | 195.2 |
| CAP_26 | 11/12/2017 | 322 | 3.9 | 1.4 | 55.8 | 7.9 | 9.2 | 3.5 | 2.2 | 207.4 |
| CAP_27 | 22/01/2018 | 305 | 4.2 | 1.2 | 55.4 | 9.1 | 9.3 | 3.5 | 1.4 | 219.6 |

| ID | Data [dd/mm/yyyy] | SI**Halite** | SI**Calcite** | SI**Dolomite** |
| --- | --- | --- | --- | --- |
| TUL_01 | 01/08/2017 | -7.47 | 0.14 | -0.8 |
| TUL_02 | 08/08/2017 | -7.65 | 0.18 | -0.79 |
| TUL_03 | 25/08/2017 | -7.34 | 0.26 | -0.56 |
| TUL_04 | 30/08/2017 | -7.62 | 0.01 | -1.13 |
| TUL_05 | 31/08/2017 | -7.69 | -0.02 | -1.23 |
| TUL_06 | 01/09/2017 | -7.65 | -0.03 | -1.25 |
| TUL_07 | 14/09/2017 | -7.57 | 0.18 | -0.79 |
| TUL_08 | 18/09/2017 | -7.46 | 0.28 | -0.59 |
| TUL_09 | 18/09/2017 | -7.47 | 0.24 | -0.67 |
| TUL_10 | 02/10/2017 | -7.58 | 0.36 | -0.45 |
| TUL_11 | 10/10/2017 | -7.14 | 0.26 | -0.63 |
| TUL_12 | 02/11/2017 | -6.96 | 0.22 | -0.74 |
| TUL_13 | 08/11/2017 | -6.98 | 0.2 | -0.76 |
| TUL_14 | 13/11/2017 | -6.98 | 0.16 | -0.85 |
| TUL_15 | 20/11/2017 | -6.88 | 0.44 | -0.3 |
| TUL_16 | 27/11/2017 | -6.89 | 0.36 | -0.49 |
| TER_01 | 09/07/2018 | -6.56 | 0.45 | -0.03 |
| TER_02 | 11/07/2018 | -6.49 | 0.72 | 0.5 |
| MAZ_01 | 11/01/2016 | -9.27 | 0 | -1.77 |
| MAZ_02 | 08/02/2016 | -8.86 | 0.38 | -0.51 |
| MAZ_03 | 14/03/2016 | -8.92 | 0.42 | -0.55 |
| MAZ_04 | 11/04/2016 | -9.01 | 0.51 | -0.08 |
| MAZ_05 | 20/04/2016 | -8.98 | 0.53 | 0.04 |
| MAZ_06 | 09/05/2016 | -9.01 | 0.42 | -0.61 |
| MAZ_07 | 06/06/2016 | -9.14 | 0.29 | -0.57 |
| MAZ_08 | 18/07/2016 | -9.01 | 0.28 | -0.57 |
| MAZ_09 | 25/07/2016 | -4.38 | 0.4 | -0.32 |
| MAZ_10 | 02/08/2016 | -8.99 | 0.36 | 0.22 |
| MAZ_11 | 12/09/2016 | -8.93 | 0.49 | 0.53 |
| MAZ_12 | 03/10/2016 | -8.95 | 0.3 | -0.48 |
| MAZ_13 | 18/10/2016 | -8.92 | 0.19 | -0.7 |
| MAZ_14 | 02/11/2016 | -8.97 | 0.22 | -0.6 |
| MAZ_15 | 20/12/2016 | -9 | 0.37 | 0.15 |
| MAZ_16 | 04/01/2017 | -8.98 | 0.33 | -0.35 |
| MAZ_17 | 08/02/2017 | -9.17 | 0.22 | -1.61 |
| MAZ_18 | 10/04/2017 | -9 | 0.41 | -0.23 |
| MAZ_19 | 02/05/2017 | -9.36 | 0.15 | -0.81 |
| MAZ_20 | 08/06/2017 | -9.27 | 0.31 | -0.85 |
| MAZ_21 | 24/07/2017 | -9.26 | 0.05 | -0.96 |
| MAZ_22 | 01/08/2017 | -9.13 | -0.07 | -1.16 |
| MAZ_23 | 11/09/2017 | -9.13 | 0.21 | -0.6 |
| MAZ_24 | 04/10/2017 | -9.31 | -0.16 | -1.37 |
| MAZ_25 | 23/10/2017 | -9.12 | -0.29 | -1.63 |
| MAZ_26 | 06/11/2017 | -9.17 | -0.15 | -1.35 |
| MAZ_27 | 11/12/2017 | -8.86 | 0.01 | -1.07 |
| MAZ_28 | 09/01/2018 | -8.9 | 0.23 | -0.7 |
| CAP_01 | 25/01/2016 | -9.46 | 0.01 | -1.67 |
| CAP_02 | 17/02/2016 | -9.18 | 0.35 | -1.3 |
| CAP_03 | 14/03/2016 | -9.14 | 0.47 | -0.31 |
| CAP_04 | 14/03/2016 | -9.19 | 0.44 | 0.22 |
| CAP_05 | 21/03/2016 | -9.16 | 0.45 | -0.25 |
| CAP_06 | 04/04/2016 | -9.18 | 0.6 | 0.14 |
| CAP_07 | 23/05/2016 | -9.25 | 0.41 | -0.53 |
| CAP_08 | 06/06/2016 | -9.31 | 0.27 | -0.54 |
| CAP_09 | 04/07/2016 | -9.14 | 0.14 | -0.71 |
| CAP_10 | 02/08/2016 | -9.18 | 0.28 | -0.45 |
| CAP_11 | 03/10/2016 | -9.14 | 0.34 | -0.29 |
| CAP_12 | 28/11/2016 | -9.06 | 0.42 | -0.31 |
| CAP_13 | 12/12/2016 | -9.15 | 0.38 | -0.36 |
| CAP_14 | 27/12/2016 | -9.33 | 0.25 | -0.63 |
| CAP_15 | 23/01/2017 | -9.15 | 0.45 | -0.25 |
| CAP_16 | 15/02/2017 | -9.22 | 0.22 | -1.58 |
| CAP_17 | 10/04/2017 | -9.17 | 0.41 | -0.19 |
| CAP_18 | 08/06/2017 | -9.45 | 0.05 | -1.27 |
| CAP_19 | 03/07/2017 | -9.49 | 0.06 | -0.88 |
| CAP_20 | 01/08/2017 | -9.28 | 0.09 | -0.79 |
| CAP_21 | 18/09/2017 | -9.24 | 0.02 | -0.92 |
| CAP_22 | 04/10/2017 | -9.41 | -0.04 | -1.06 |
| CAP_23 | 20/11/2017 | -9.19 | 0.07 | -0.92 |
| CAP_24 | 06/12/2017 | -9.09 | -0.07 | -1.27 |
| CAP_25 | 06/12/2017 | -9.02 | -0.18 | -1.49 |
| CAP_26 | 11/12/2017 | -8.99 | 0.22 | -0.73 |
| CAP_27 | 22/01/2018 | -8.95 | 0.08 | -0.94 |
